1 **Title:** Promoting Vigorous Intermittent Lifestyle Physical Activity (VILPA) in middle-aged adults:  
2 An evaluation of the MovSnax mobile app

3 **Authors:** Cecilie Thøgersen-Ntoumani<sup>1</sup>, Anne Grunseit<sup>2</sup>, Andreas Holtermann<sup>3</sup>, Sarah Steiner<sup>4,5</sup>,  
4 Catrine Tudor-Locke<sup>6</sup>, Annemarie Koster<sup>7</sup>, Nathan Johnson<sup>5</sup>, Carol Maher<sup>\*8</sup>, Matthew Ahmadi<sup>4,5</sup>,  
5 Josephine Y. Chau<sup>9</sup>, Emmanuel Stamatakis<sup>4,5</sup>

6 \*Corresponding author

7 Carol Maher, Alliance for Research in Exercise, Nutrition and Activity (ARENA) Research Centre,  
8 Allied Health and Human Performance, University of South Australia, Adelaide, Australia. Email:  
9 Carol.Maher@unisa.edu.au

10 <sup>1</sup>Danish Centre for Motivation and Behaviour Science (DRIVEN), Department of Sports Science  
11 and Clinical Biomechanics, University of Southern Denmark, Odense, Denmark. Email:  
12 cthogersen@health.sdu.dk

13 <sup>2</sup>School of Public Health, Faculty of Health, University of Technology Sydney, Broadway, Ultimo,  
14 2007, NSW, Australia. Email: Anne.Grunseit@uts.edu.au

15 <sup>3</sup>National Research Centre for the Working Environment, Copenhagen, Denmark. Email:  
16 aho@nfa.dk

17 <sup>4</sup>Mackenzie Wearables Research Hub, Charles Perkins Centre, The University of Sydney, Sydney,  
18 Australia. Emails: SS: sarah.steiner@sydney.edu.au; MA: matthew.ahmadi@sydney.edu.au; ES:  
19 emmanuel.stamatakis@sydney.edu.au

20 <sup>5</sup>School of Health Sciences, Faculty of Medicine and Health, The University of Sydney, NSW,  
21 Australia, 1 John Hopkins Drive, 2050, Camperdown, Sydney, New South Wales, Australia. NJ:  
22 Email: nathan.johnson@sydney.edu.au

23 <sup>6</sup>College of Health and Human Service, University of North Carolina at Charlotte, 9201 University  
24 City Blvd, Charlotte, NC, USA 28223. Email: tudor-locke@charlotte.edu

25 <sup>7</sup>Department of Social Medicine, CAPHRI Care and Public Health Research Institute, Maastricht  
26 University, Maastricht, the Netherlands. Email: a.koster@maastrichtuniversity.nl

27 <sup>8</sup>Alliance for Research in Exercise, Nutrition and Activity (ARENA) Research Centre, Allied  
28 Health and Human Performance, University of South Australia, Adelaide, Australia. Email:  
29 Carol.Maher@unisa.edu.au

30 <sup>9</sup>Josephine Y. Chau: Department of Health Sciences, Faculty of Medicine, Health and Human  
31 Sciences, Macquarie University, Sydney, Australia. Email: josephine.chau@mq.edu.au

32



## 34 **Abstract**

### 35 Background

36 Most adults fail to meet the moderate to vigorous physical activity-based recommendations needed  
37 to maintain or improve health. Vigorous Intermittent Lifestyle Physical Activity (VILPA) refers to  
38 short (1-2 mins) high-intensity activities that are integrated into activities of daily living. VILPA  
39 has shown strong potential to improve health and addresses commonly reported barriers to physical  
40 activity. However, it is unknown how VILPA can best be promoted among the adult population.  
41 This study aimed to evaluate the usability, user engagement, and satisfaction of a mobile application  
42 (MovSnax) designed to promote VILPA.

### 43 Methods

44 A concurrent mixed methods design was used. It comprised four parts. Part A was a survey with  
45  $n=8$  mHealth and physical activity experts who had used the app over 7-10 days. Part B was think-  
46 aloud interviews with  $n=5$  end-users aged 40-65 years old. Part C was a survey with a new group of  
47 40-65-year-old end-users ( $n=35$ ) who had used the MovSnax app over 7-10 days. Part D was semi-  
48 structured interviews with  $n=18$  participants who took part in Part C. Directed content analysis was  
49 used to analyze the results from Parts A, B, and D, and descriptive statistics were used to analyze  
50 findings from Part C.

### 51 Results

52 Participants reported positive views on the MovSnax app for promoting VILPA but also identified  
53 usability issues such as unclear purpose, difficulties in manual data entry, and limited customization  
54 options. Across the different data collections, they consistently emphasized the need for more  
55 motivational features, clearer feedback, and gamification elements to enhance engagement.

56 Quantitative assessment showed satisfactory scores on objective measures but lower ratings on  
57 subjective aspects, possibly due to unfamiliarity with the VILPA concept and/or technical barriers.

## 58 Conclusions

59 The MovSnax app, tested in the present study, is the world's first digital tool aimed specifically at  
60 increasing VILPA. The findings of the present study underscore the need for further app refinement,  
61 focusing on clarifying its purpose and instructions, boosting user engagement through  
62 personalization and added motivational elements, enhancing accuracy in detecting VILPA bouts,  
63 implementing clearer feedback mechanisms, expanding customization choices (such as font size  
64 and comparative data), and ensuring transparent and meaningful activity tracking.

65 Keywords (3-10): Vigorous Intermittent Lifestyle Physical Activity (VILPA); physical activity,  
66 digital health, middle-aged adults; mobile application; evaluation; usability testing

67

## 68 **Introduction**

69 The evidence supporting the health and well-being benefits of physical activity (PA) is unequivocal  
70 (e.g., (1–3). Current PA guidelines recommend that adults should engage in 150-300 minutes of  
71 moderate-to-vigorous PA per week, or 75-150 minutes of vigorous PA, or an equivalent amount to  
72 realize these health benefits. However, most adults (especially middle-aged and older) do not  
73 achieve these guidelines (4,5). The existence of the well-documented intention-behaviour gap (6)  
74 suggests that although adults are aware of the benefits that result in positive intentions to change,  
75 these intentions often do not translate into behavioural changes. This apparent paradox can be  
76 explained by a myriad of barriers that adults experience in their efforts to increase PA. A systematic  
77 review has shown that, among middle-aged and older adults, these barriers include environmental  
78 factors (e.g., cost, weather, facilities), individual psychological factors (such as difficulties  
79 regulating PA behaviour, doubts about personal capabilities, and lack of motivation), health-related  
80 characteristics (e.g., pain, poor health), and opportunity barriers, in particular perceived time  
81 constraints (7).

82 In 2020, the requirement for a minimum bout length for PA was removed from the World  
83 Health Organization’s PA guidelines in recognition of emerging evidence that shorter bouts do  
84 confer a health benefit (8) and to account for those who report time constraints as a barrier or may  
85 not be willing or able to engage in structured exercise. Moreover, accumulation of PA through  
86 shorter bouts may be more manageable for individuals facing barriers associated with time and  
87 health. The concept of Vigorous Intermittent Lifestyle Physical Activity, referred to as “VILPA”  
88 (9), was developed to address these barriers. VILPA refers to brief, vigorous bursts of PA lasting 1-  
89 2 minutes each that are integrated into activities of daily living, such as fast walking to the bus, stair  
90 climbing, lifting, or playing actively with children, or walking uphill (9). While other related  
91 concepts have been proposed (e.g., exercise snacks; (10)), VILPA distinguishes itself by its focus

92 on integration of specifically vigorous intensity movement into activities of daily living. VILPA is  
93 also the only example of vigorous short bout PA that is supported by epidemiological evidence  
94 (11,12). Indeed, a recent large epidemiological study focused on non-exercisers identified in the UK  
95 Biobank revealed that, compared to individuals performing no VILPA, engaging in three VILPA  
96 bouts per day (lasting the equivalent of 1 or 2 minutes each) was linked to a substantially lowered  
97 risk of cardiovascular disease (CVD) mortality (by 48–49%) and a marked reduction in all-cause  
98 and cancer mortality risk (by 38–40%), and analogous reductions in cancer incidence risk (13) over  
99 7 years. These findings underscore the potential of VILPA as an alternative approach to structured  
100 exercise, providing a feasible option for accruing health benefits through brief, vigorously intense,  
101 physical activity bouts into daily life.

102 To date, there are no published studies of interventions designed to promote VILPA.  
103 However, a recent qualitative study with physically inactive adults aged 35-76 ( $N=78$ ) provided  
104 insight into perceived barriers and enablers of VILPA for this group (14). The findings showed that  
105 the barriers and enablers of VILPA differed somewhat to those of other types of PA. The results  
106 suggested that barriers to VILPA could be addressed by developing guidelines, addressing safety  
107 concerns, and clearly explaining the potential benefits of, and opportunities to perform and  
108 accumulate, VILPA. Additionally, VILPA could be promoted by focusing on its time-efficient  
109 nature which requires no special equipment or allocated time (e.g., gym sessions) and could be  
110 enhanced via the use of prompts and reminders provided at opportune times, and by implementing  
111 habit formation strategies (15).

112 Digital technology is increasingly used as a tool to promote physical activity (16,17).  
113 Smartphone applications (henceforth referred to as mobile apps) have been particularly popular  
114 digital tools in the PA field. Given the ubiquitous use of mobile phones, mobile apps have the  
115 advantage that they have the potential for wide reach, represent an affordable means of promoting

116 PA, and are a convenient means of engaging many individuals at once. These apps can incorporate  
117 a range of behaviour modification techniques designed to change PA behaviour, such as education,  
118 individual goal setting, prompts and reminders, self-monitoring, and behavioural feedback. Meta-  
119 analytic evidence has provided some support demonstrating the ability of smartphone app-based  
120 interventions to promote PA (16–18). One review has shown that factors such as user guidance,  
121 health information, statistical progress information, reminders, self-monitoring, goal setting and  
122 perceived utility of the app influence the uptake and engagement with health and well-being apps  
123 (19).

124 Mobile apps could be a highly suitable VILPA intervention delivery tool in terms of  
125 convenience because people tend to carry their phones with them when performing daily living  
126 activities, and because they can provide real-time feedback on behaviour. However, to date, to our  
127 knowledge, there are no apps supporting VILPA. Thus, the present study aimed to evaluate the  
128 usability, user engagement, and satisfaction of a smartphone app designed to promote VILPA  
129 among adults aged 40-65 years old. mHealth solutions like this offer the ability to promote VILPA,  
130 helping combat physical inactivity and reducing the risk of chronic diseases, in a scalable and user-  
131 centred way.

## 132 **Method**

### 133 **Design**

134 A concurrent mixed methods design, comprising surveys and one-on-one interviews, was used to  
135 evaluate the app. The mobile app was evaluated in four parts: Part A) an expert survey (experts  
136 were defined as researchers who had published peer-reviewed studies on physical activity and  
137 mHealth), Part B) think-aloud interviews with target end-users, Part C) a feedback survey with a

138 new group of target end-users, and Part D) individual interviews with a purposeful selection of  
139 participants from c).

#### 140 **Ethics**

141 Ethics approval for the study (including Parts A-D) was granted by the University of Sydney's  
142 Human Research Ethics Committee (2021/533), prior to the commencement of recruitment of the  
143 participants. Participants were informed about the study and had the opportunity to ask questions  
144 prior to agreeing to take part. All participants signed written consent forms prior to participating in  
145 the study.

#### 146 **Procedure and Measures**

147 The studies took place from 2022 to 2023.

148 *Description of the MovSnax mobile app.* A customized app (MovSnax) was developed for the iOS  
149 platform with the intention to promote VILPA among middle-aged adults (see Figure 1). As VILPA  
150 is an academic term unlikely to be fully understood by the lay public, we presented VILPA to the  
151 participants as “vigorous movement snacks” to make it more accessible and tangible for the  
152 participants. Decisions about which app features to include were based on reviews of the extant  
153 literature on mHealth and physical activity (18,20) and the results of focus groups with members of  
154 the target group about barriers and enablers of VILPA (14). The app included automatic detection  
155 and daily reporting of VILPA bouts (fast walking and stair climbing), opportunities to set and adjust  
156 daily goals, behavioural feedback on daily, weekly, and monthly goal achievement, and dynamic  
157 educational and motivational messages which were randomly provided to participants via push  
158 notifications in response to periods of inactivity. The app also allowed participants to manually add  
159 VILPA bouts, confirm or adjust automatically detected VILPA bouts, enable or disable push  
160 notifications and provide feedback on the app. It also collected additional physical activity metrics



161 which were harnessed through the native smartphone app (Apple Health), such as the number of  
162 steps accumulated each day. The choice to include educational and motivational messages was  
163 based on the results of online surveys with a) researchers with communication expertise, and b) 40–  
164 65-year-old physically inactive adults (results of which are not provided here).

165 Part A: *Expert survey*. Researchers from the authors' research networks and contacts with expertise  
166 in physical activity and/or mHealth (who had published peer-reviewed studies on physical activity  
167 and mHealth) were contacted via email by the research team and asked to volunteer to download the  
168 app prototype and use it daily for 7-10 days. Subsequently, they were sent an online survey with  
169 open response formats asking them to comment on the app's functionality, aesthetics, design,  
170 perceived usability, benefits, and practicability for the target users (i.e., 40-65-year-old physically  
171 inactive adults). They were also asked to comment on what they did and did not like, plus  
172 encouraged to reflect on how the app could be improved. The survey is included in Additional File  
173 1.

174 Part B: *Think-aloud interviews with target end-users*. Adult volunteers aged 40-65 years who were  
175 based in Australia were recruited via Facebook ads which targeted people in the age group (40–65-  
176 year-old adults) who did not list any sports and recreational activities in their profiles. Upon  
177 contacting the research assistant, interested participants were asked to complete a screening  
178 questionnaire to assess eligibility criteria that participants: did not take part in a structured exercise  
179 program three or more times per week (a similar measure was used in (14)), owned an iPhone; had  
180 no mental illness which would preclude participation and were 40 to 65 years of age. Eligible  
181 participants who agreed to participate were invited to a one-to-one session with a member of the  
182 research team. Four of the interviews were conducted in-person in a meeting room at the University  
183 where the study took place, and one interview was conducted online via Zoom with the camera  
184 function switched off. The purpose of the session was to get target users' firsthand impressions of

185 the app. The approach previously used by White and colleagues (21,22) was adopted. The  
186 participants were requested to verbally express their thoughts, impressions, and emotions as they  
187 explored the app in full for the first time in the presence of the researcher. The interviews were  
188 audio-recorded, then transcribed verbatim. No notes were taken during the interviews.

189 *Part C: Free-living end-user mobile app test with target end-users.* A new group of adults 40-65  
190 years of age were recruited via Facebook ads. The inclusion criteria were identical to those for Part  
191 B. Once participants had consented to take part in the study, they downloaded the app, were  
192 encouraged to use it daily over a 7–10-day period and were then asked to complete the User  
193 Version of the Mobile Application Rating Scale (uMARS) (23) to assess engagement, functionality,  
194 aesthetics, information (quantity, quality and credibility), and perspectives on the potential  
195 behavioral impact of the app. The uMARS is a 20-item scale which is frequently used to evaluate  
196 the quality of apps. The scale provides an overall app quality score (called objective quality) and  
197 consists of four sub-scales: engagement (entertainment, customization), functionality (ease of use,  
198 navigation), aesthetics (layout, graphics, visual appeal), and information (quality, quantity). A  
199 subjective app quality score can also be computed based on questions on the extent to which  
200 participants would recommend the app to other people, whether they would pay for the app, and the  
201 star-based rating they would give the app. Finally, perceived impact was computed based on  
202 answers relating to questions on the extent to which the app increased awareness, knowledge,  
203 changed attitudes and intentions to change, induced help seeking, and the likelihood of the app  
204 promoting behaviour change. Each item was rated on a scale from 1 to 5, with 1 being the least  
205 desirable (e.g., not at all/strongly disagree) and 5 being the most desirable (e.g., definitely/strongly  
206 agree). A score of 3 has been described as satisfactory (24,25). Evidence of the scale's internal and  
207 test-retest reliability has been provided in previous studies (23).

208 Part D: *Interviews with target end-users from Part C*. Volunteer participants were purposefully  
209 selected to explore their views from the survey (Part C) in more detail. Purposeful sampling was  
210 used whereby participants representing different demographics, and who had more, and less  
211 favourable views of the app were selected. All interviews were conducted via Zoom with the  
212 camera setting switched off. Questions pertained to their experiences of using the app, what they  
213 liked and disliked about the app, which functions of the app they used, which features were least  
214 versus most useful, and how they thought the app could be improved. The interview schedule is  
215 presented in Additional File 2. The interviews were recorded via the audio function in Zoom, then  
216 transcribed verbatim. No notes were taken during the interviews.

217 At the end of Part D, the app was revised to incorporate the results from Parts A-D.

## 218 **Data analysis**

219 Directed content analysis (26) was used to analyse the open-ended survey responses from experts  
220 (Part A), the think-aloud interviews (Part B), and the final interviews (Part D). Codes, which are  
221 short descriptive labels, were created to organize and understand the data. The first author read and  
222 re-read the data to become familiarized with the data. She then inductively developed the codes and  
223 sub-codes and provided example quotes for each. The second and penultimate authors read through  
224 a selection of the Part B and D interviews and critically appraised the codes and sub-codes  
225 developed by the first author. This resulted in the revision of some of the codes and sub-codes. Part  
226 C data were analysed using descriptive statistics.

## 227 **Results**

228 *Part A*. Twenty experts signed the consent form. Of those, eight researchers ( $N=3$  females,  $N=4$   
229 males,  $N=1$  unknown) downloaded the app, used it in their daily lives for 7-10 days, and then  
230 completed the online expert survey. The participants engaged in  $M$  (SD) = 9 (11) (range 4-41)

231 vigorous movements snacks per day during the testing phase. The survey results from this stage are  
232 reported in detail in Additional File 3. We created six codes: Purpose, design, ease of use, user  
233 engagement, tracking and reporting, and education and knowledge. Overall, the participants  
234 reported finding the app visually appealing and relatively easy to use. However, there were  
235 concerns about the lack of clarity about the purpose of the app and a lack of instructions about how  
236 to use the app effectively. User engagement was a prominent theme with several suggestions  
237 provided for how the app could be improved to increase engagement. These included allowing for  
238 more personalization, adding motivational features (such as gamification) beyond monitoring, and  
239 adding push notifications to remind and otherwise engage the users with the app over the longer  
240 term.

241 The automatic detection of vigorous movement snacks was generally viewed by the  
242 respondents as a strength of the app, although several participants stated that the reporting of the  
243 VILPA bouts was often inaccurate. This could, however, at least partly reflect that the participants  
244 might have done VILPA without realising it. Two participants mentioned that accurate syncing  
245 between the app and other fitness trackers was needed. One participant also noted difficulties  
246 accessing basic data such as step counts. Another participant noted that they found it frustrating  
247 having to manually confirm automatically detected data. The need to improve the accuracy of the  
248 automatically detected VILPA bouts without having to manually confirm these appeared important  
249 to several participants. Finally, while educational messages were included in the app, some  
250 participants mentioned that the app should include short educational videos and provide more  
251 information about the importance of doing daily VILPA. Overall, the analysis of the data from Part  
252 A revealed that the app had several positive features that the end-user might find useful. However,  
253 the results also demonstrated that improvements could be made to enhance user engagement,  
254 motivation, and overall user experience.

255 *Part B.* Five target end-users (3 females, and 2 males) took part in the think-aloud interviews. All  
256 participants completed all tasks on the walkthrough checklist. Additional File 4 presents the coding  
257 framework and the specific findings. Seven inductive codes were developed: Onboarding process,  
258 user experience, user interface design, education, data detection, recognition and rewards, and  
259 customisation. The findings highlighted several issues and suggestions regarding the password  
260 setup process and user interface of the app. Users expressed frustration with the current method of  
261 password validation, advocating for immediate notification of criteria non-compliance to avoid  
262 repetitive data entry. Additionally, there was a desire for clearer guidance on password  
263 requirements and parameters. Furthermore, users offered feedback on various aspects of the app's  
264 functionality, including customization options, iconography, and colour scheme, suggesting  
265 improvements for a more user-friendly experience. Other feedback centred on the need for  
266 clarification on terminology as well as features related to goal setting, data tracking, user profiles,  
267 and being acknowledged for longer-bout activity that did not meet the VILPA criteria. Overall, the  
268 findings underscored the importance of refining the app's interface and functionality to enhance user  
269 satisfaction and engagement.

270 *Part C.* Of 54 end-users who provided written informed consent to participate,  $N=35$  target end-  
271 users ( $N=28$  females, 7 males; age range = 40-65;  $M$  (SD) age = 54.09 (7.57)) downloaded the app,  
272 used it daily over a 7–10-day period and then completed the uMARS (23). The socio-demographic  
273 and health characteristics of the participants are presented in Additional File 5. On average, the  
274 participants completed 4 ( $SD=4$ ; range: 1-16) VILPA bouts per day during the testing period. The  
275 results on perceptions of app quality as rated by the uMARS are presented in Table 1. The objective  
276 quality score was the highest overall (an above-average rating), while the subjective rating was the  
277 lowest. In terms of the objective sub-scale, the participants rated the app highest for aesthetics and  
278 information, and the lowest rated subscale was for engagement. Although the subjective quality

279 ratings were fairly low, perceived impact, awareness and behaviour change were rated above the  
280 score 3 which have been previously defined as satisfactory (24,27).

281 *Part D.* Eighteen participants from Part C signed the consent form, and  $N=15$  ( $n=11$  females,  $n=4$   
282 males; age range=40-63) agreed to take part in the interviews. Additional Table 6 presents the  
283 coding framework and specific findings. We constructed 5 codes: App concept, user experience,  
284 customization, user engagement, and transparent and meaningful tracking.

285 *App concept.* Participants generally had positive views on the app's concept, recognizing its  
286 potential value despite acknowledging the need for improvements. They appreciated its focus on  
287 various aspects of movement beyond step count, such steps per minute, and its ability to  
288 acknowledge small efforts in physical activity. Some participants expressed enthusiasm for the idea  
289 and willingness to use it once operational issues were resolved, and others believed it was a good  
290 concept with potential once tweaks were made. Overall, participants were positive about the app's  
291 concept while recognizing the importance of refinement for its effectiveness.

292 *User experience.* Participants had mixed views on the usability and effectiveness of the app's  
293 interface. Some praised its simplicity, clean design, and ease of navigation, finding it pleasant, user-  
294 friendly, and motivating. They appreciated features like clear notifications and the ability to view  
295 data intuitively. However, others criticized the lack of explanatory information, difficulty in  
296 understanding functionalities like manual data entry, and overwhelming amount of data without  
297 clear direction or value. They expressed frustration with the interface's limitations, including the  
298 inability to customize or expand features, leading to a perception of minimal gain for significant  
299 effort. Overall, while some found the interface intuitive and motivating, others struggled with its  
300 usability and felt it lacked essential explanations and functionalities.

301 *Customization.* Participants expressed dissatisfaction with the lack of customization options in the  
302 app, particularly regarding font size, which posed challenges for users with specific accessibility  
303 needs. They also highlighted the absence of comparative data with peers or benchmarks based on  
304 age or other demographics, which they believed would enhance motivation. Additionally, they  
305 emphasized the importance of considering age-related factors such as text size for readability,  
306 suggesting that tailored features could improve user experience and engagement, particularly for  
307 older individuals. Overall, participants desired more flexibility in customization and comparative  
308 data to personalize their experience and enhance motivation to use the app.

309 *User engagement.* Participants noted that while the app kept them entertained and motivated to  
310 achieve their goals, they felt that it lacked some features which conferred rewards. Some credited  
311 the app with motivating them to do VILPA bouts they might not have otherwise done. However,  
312 they also expressed a desire for gamification, for example, more tangible rewards, such as a system  
313 of reward points to incentivize participation, which would motivate them for sustained use of the  
314 app over the longer-term. Additionally, participants highlighted the importance of clear feedback  
315 mechanisms within the app, such as congratulatory messages or visual cues like fireworks upon  
316 goal completion, to enhance their sense of achievement and motivation. They suggested  
317 incorporating more interactive features like prompts and notifications to encourage consistent  
318 engagement and goal attainment. Gamification was mentioned as a potential mobile app feature that  
319 could keep participants engaged.

320 *Transparent and meaningful tracking.* The participants expressed mixed feelings about the amount  
321 of data collected. While some appreciated the app's sensitivity in picking up various movements  
322 and generating a significant amount of data, others found it overwhelming and lacking in  
323 meaningfulness, particularly when faced with a high volume of recordings. Some noted instances in  
324 which certain activities were not accurately counted, which led to frustration and confusion

325 regarding the app's tracking mechanisms. Despite these concerns by some participants, others  
326 reported no issues with the tracking and believed it accurately recorded their activities. Overall, the  
327 participants highlighted the importance of striking a balance between sensitivity and  
328 meaningfulness in data collection, as well as ensuring accurate tracking to enhance the user  
329 experience and satisfaction with the app.

### 330 **Discussion**

331 The purpose of the present study was to evaluate a customized mobile app, MovSnax, designed to  
332 promote VILPA (referred to as vigorous movement snacks among participants) among middle-aged  
333 adults 40-65 years of age. The evaluation of the MovSnax mobile app, designed to promote VILPA  
334 among middle-aged adults, has provided insights into its potential effectiveness and areas for  
335 improvement. Our findings reveal an interplay between the app's perceived strengths and the  
336 opportunities for enhancement identified by users and experts. Participants acknowledged the app's  
337 aesthetic appeal and informative content and appreciate its innovative approach to promoting  
338 physical activity through VILPA. However, the feedback highlighted several areas needing  
339 refinement, such as enhancing user engagement, improving the accuracy of activity tracking, and  
340 expanding customization options. Despite the generally positive perceptions of the app's concept  
341 and functionality, both the end-users and experts emphasized the need for clearer instructions, more  
342 interactive features, and a deeper integration of motivational elements to foster sustained app usage  
343 and, ultimately, a more active lifestyle.

344 Overall, the data suggested that the participants viewed the concept of the app positively,  
345 despite some identified issues with its usability and functionality. They appreciated the app's focus  
346 on integrating VILPA into daily activities, aligning with the growing interest in this approach as an  
347 alternative to structured exercise, especially for those with time constraints and health concerns.



348 However, participants also noted areas for improvement in the app's user interface, particularly  
349 regarding clarity of purpose and difficulties in manual data entry. They expressed a desire for more  
350 customization options and comparative data with peers. Additionally, participants stressed the  
351 importance of incorporating motivational features and rewards to enhance engagement and  
352 adherence to VILPA. While the app was praised for motivating short vigorous intensity activities,  
353 some participants wanted more tangible rewards (e.g., reward points and leaderboards) and clearer  
354 feedback mechanisms. These suggestions align with the results of a systematic review on the factors  
355 that facilitate the uptake and engagement with health and well-being smartphone apps (19).  
356 Gamification was also mentioned by both the end-users and the experts as a possible feature that  
357 could help engage the users. Indeed, meta-analyses have highlighted gamification, which uses game  
358 design elements (e.g., points and leaderboards), as a promising feature in the promotion of physical  
359 activity (28,29). The study also revealed mixed feelings among the participants about the amount of  
360 data collected by the app, with some finding it overwhelming and lacking in meaningfulness. This  
361 underscores the importance of striking a balance between sensitivity and meaningfulness to users  
362 when harvesting data.

363       Regarding the quantitative data, in Part C, the MovSnax app scored over 3 (on a 5-point scale)  
364 on the overall objective quality dimension of the uMARS, and its sub-components functionality,  
365 aesthetics, and information. The app also received scores of over 3 on perceived impact relating to  
366 raising awareness (of VILPA), encouraging behaviour change and changing attitudes plus  
367 increasing intentions to increase VILPA. As scores of 3 and above on the uMARS have previously  
368 been described as satisfactory (24,27), our results suggest that the app was satisfactory for some  
369 criteria (overall objective quality dimension, functionality, aesthetics, and information, and impact)  
370 and less than satisfactory (<3) for others (subjective quality, including, e.g., star-based ratings of the  
371 app, and the extent to which participants were willing to pay for the app). The relatively low scores

372 on subjective app quality overall could be due to two reasons. First, MovSnax tested a new physical  
373 activity concept that the participants were unfamiliar with. The qualitative data suggested that many  
374 participants struggled to understand the purpose of the app and that it lacked guidance and clarity,  
375 including information about what qualified as a VILPA bout. Second, the qualitative data revealed a  
376 diverse number of barriers, many of which were technical, which participants experienced in their  
377 use of the app. The lowest rated item was on their willingness to pay for the app ( $M=1.91$ ). This  
378 could be partly explained by the large number of freely available fitness and exercise apps, creating  
379 expectations of mobile apps being provided at no cost.

380 To our knowledge, MovSnack is the first mobile app anywhere in the world, aimed at support  
381 VILPA. Strengths of the study include its grounding in a solid evidence base of formative work  
382 with the target population, ensuring it addressed their stated needs and preferences. Furthermore, we  
383 used a mixed-methods design, which allowed for a comprehensive evaluation of the mobile app and  
384 triangulation of data. Another strength was that we included both end-users and experts in the multi-  
385 stage evaluation. Combining these perspectives allows for an identification of a wider range of  
386 strengths and weaknesses, leading to more informed decisions for app refinement and enhancement.  
387 Finally, we used a standardized tool to assess app quality and user perceptions, which facilitates  
388 comparisons with existing research findings and promotes transparency in reporting the results of  
389 app evaluations. However, some limitations associated with the app and the study design also need  
390 to be considered in the interpretation of the study's findings. First, due to time and other practical  
391 constraints, it was not possible to test the app iteratively. Further, the app was developed for iOS  
392 platforms, possibly limiting the generalizability of the findings. However, iOS is the leading mobile  
393 operating system in Australia with 60% of the market in 2023 (30). Finally, app usage data (how  
394 long and how often the participants interacted with different features of the app) could not be  
395 retrieved due to technical problems.

396 The study's findings hold implications for the broader field of mobile health, particularly in  
397 the domain of promoting physical activity amongst middle-aged adults. The insights gained from  
398 the MovSnax app evaluation illuminate the critical balanced required between technological  
399 innovation, user engagement, and practical functionality in app design. It underscores the need to  
400 embed motivation psychology within the app's framework, suggesting that future mHealth tools  
401 should integrate personalised, adaptive features, that resonate with users' lifestyles and preferences,  
402 thereby promoting sustained engagement. Future research is needed to refine the app features and  
403 functionality incorporating user feedback. Evaluation using an experimental, controlled trial design  
404 will then be warranted, to determine the app's impact on VILPA behaviour change, and sustainment  
405 of such change. More broadly, integrating advanced data analytics and machine learning could offer  
406 personalised insights to users, potentially revolutionising the way VILPA interventions are  
407 delivered and experienced.

## 408 **Conclusion**

409 The mobile app evaluated in the present study represents the world's first (digital) tool designed to  
410 promote VILPA in middle-aged adults. The results of a mixed methods evaluation with mHealth  
411 and physical activity experts and target users suggest some future potential of the MovSnax app.  
412 However, our findings also suggest that the app could be refined by addressing concerns about  
413 clarity of purpose and instructions, improving user engagement through personalization and the  
414 provision of additional motivational features, enhancing the accuracy of automatically detected  
415 VILPA bouts, providing clearer feedback mechanisms, offering more customization options (e.g.,  
416 font size and comparative data), and ensuring transparent and meaningful tracking of activities. The  
417 findings from the present study pinpoint specific areas to enhance the MovSnax app. Future  
418 research should utilize these insights to develop and assess an improved app version, followed by  
419 feasibility studies and larger trials to evaluate long-term user engagement, behaviour change

420 outcomes, and user experiences through qualitative research. Once refined, the MovSnax app may  
421 be used as one component of complex interventions designed to promote VILPA in middle-aged  
422 adults, who are unwilling or unable to take part in structured exercise.

#### 423 References

- 424 1. Blond K, Brinkløv CF, Ried-Larsen M, Crippa A, Grøntved A. Association of high amounts of  
425 physical activity with mortality risk: a systematic review and meta-analysis. *Br J Sports Med.*  
426 2020 Oct 1;54(20):1195–201.
- 427 2. Buecker S, Simacek T, Ingwersen B, Terwiel S, Simonsmeier BA. Physical activity and  
428 subjective well-being in healthy individuals: a meta-analytic review. *Health Psychology*  
429 *Review.* 2021 Oct 2;15(4):574–92.
- 430 3. Zhang YB, Pan XF, Chen J, Cao A, Xia L, Zhang Y, et al. Combined lifestyle factors, all-cause  
431 mortality and cardiovascular disease: a systematic review and meta-analysis of prospective  
432 cohort studies. *J Epidemiol Community Health.* 2021 Jan 1;75(1):92–9.
- 433 4. Hallal PC, Andersen LB, Bull FC, Guthold R, Haskell W, Ekelund U. Global physical activity  
434 levels: surveillance progress, pitfalls, and prospects. *The Lancet.* 2012 Jul 21;380(9838):247–  
435 57.
- 436 5. Sun F, Norman IJ, While AE. Physical activity in older people: a systematic review. *BMC*  
437 *Public Health.* 2013 May 6;13(1):449.
- 438 6. Rhodes RE, de Bruijn GJ. How big is the physical activity intention–behaviour gap? A meta-  
439 analysis using the action control framework. *British Journal of Health Psychology.*  
440 2013;18(2):296–309.
- 441 7. Spiteri K, Broom D, Bekhet AH, Caro JX de, Laventure B, Grafton K. Barriers and Motivators  
442 of Physical Activity Participation in Middle-Aged and Older Adults—A Systematic Review.  
443 *Journal of Aging and Physical Activity.* 2019 Dec 1;27(6):929–44.
- 444 8. WHO guidelines on physical activity and sedentary behaviour [Internet]. [cited 2024 Mar 25].  
445 Available from: <https://www.who.int/publications-detail-redirect/9789240015128>
- 446 9. Stamatakis E, Huang BH, Maher C, Thøgersen-Ntoumani C, Stathi A, Dempsey PC, et al.  
447 Untapping the Health Enhancing Potential of Vigorous Intermittent Lifestyle Physical Activity  
448 (VILPA): Rationale, Scoping Review, and a 4-Pillar Research Framework. *Sports Med.* 2021  
449 Jan 1;51(1):1–10.
- 450 10. Jones MD, Clifford BK, Stamatakis E, Gibbs MT. Exercise Snacks and Other Forms of  
451 Intermittent Physical Activity for Improving Health in Adults and Older Adults: A Scoping  
452 Review of Epidemiological, Experimental and Qualitative Studies. *Sports Med [Internet].* 2024  
453 Jan 8 [cited 2024 Mar 25]; Available from: <https://doi.org/10.1007/s40279-023-01983-1>

- 454 11. Stamatakis E, Ahmadi MN, Gill JMR, Thøgersen-Ntoumani C, Gibala MJ, Doherty A, et al.  
455 Association of wearable device-measured vigorous intermittent lifestyle physical activity with  
456 mortality. *Nat Med*. 2022 Dec;28(12):2521–9.
- 457 12. Ahmadi MN, Hamer M, Gill JMR, Murphy M, Sanders JP, Doherty A, et al. Brief bouts of  
458 device-measured intermittent lifestyle physical activity and its association with major adverse  
459 cardiovascular events and mortality in people who do not exercise: a prospective cohort study.  
460 *The Lancet Public Health*. 2023 Oct 1;8(10):e800–10.
- 461 13. Stamatakis E, Ahmadi MN, Friedenreich CM, Blodgett JM, Koster A, Holtermann A, et al.  
462 Vigorous Intermittent Lifestyle Physical Activity and Cancer Incidence Among Nonexercising  
463 Adults: The UK Biobank Accelerometry Study. *JAMA Oncology*. 2023 Sep 1;9(9):1255–9.
- 464 14. Thøgersen-Ntoumani C, Kritz M, Grunseit A, Chau J, Ahmadi M, Holtermann A, et al. Barriers  
465 and enablers of vigorous intermittent lifestyle physical activity (VILPA) in physically inactive  
466 adults: a focus group study. *Int J Behav Nutr Phys Act*. 2023 Jul 4;20(1):78.
- 467 15. Ma H, Wang A, Pei R, Piao M. Effects of habit formation interventions on physical activity  
468 habit strength: meta-analysis and meta-regression. *Int J Behav Nutr Phys Act*. 2023 Sep  
469 12;20(1):109.
- 470 16. Romeo A, Edney S, Plotnikoff R, Curtis R, Ryan J, Sanders I, et al. Can Smartphone Apps  
471 Increase Physical Activity? Systematic Review and Meta-Analysis. *Journal of Medical Internet  
472 Research*. 2019 Mar 19;21(3):e12053.
- 473 17. Yerrakalva D, Yerrakalva D, Hajna S, Griffin S. Effects of Mobile Health App Interventions on  
474 Sedentary Time, Physical Activity, and Fitness in Older Adults: Systematic Review and Meta-  
475 Analysis. *Journal of Medical Internet Research*. 2019 Nov 28;21(11):e14343.
- 476 18. Laranjo L, Ding D, Heleno B, Kocaballi B, Quiroz JC, Tong HL, et al. Do smartphone  
477 applications and activity trackers increase physical activity in adults? Systematic review, meta-  
478 analysis and metaregression. *Br J Sports Med*. 2021 Apr 1;55(8):422–32.
- 479 19. Szinay D, Jones A, Chadborn T, Brown J, Naughton F. Influences on the Uptake of and  
480 Engagement With Health and Well-Being Smartphone Apps: Systematic Review. *Journal of  
481 Medical Internet Research*. 2020 May 29;22(5):e17572.
- 482 20. Eckerstorfer LV, Tanzer NK, Vogrincic-Haselbacher C, Kedia G, Brohmer H, Dinslaken I, et  
483 al. Key Elements of mHealth Interventions to Successfully Increase Physical Activity: Meta-  
484 Regression. *JMIR mHealth and uHealth*. 2018 Nov 12;6(11):e10076.
- 485 21. White BK, Burns SK, Giglia RC, Scott JA. Designing evaluation plans for health promotion  
486 mHealth interventions: a case study of the Milk Man mobile app. *Health Promotion Journal of  
487 Australia*. 2016;27(3):198–203.
- 488 22. White BK, Martin A, White JA, Burns SK, Maycock BR, Giglia RC, et al. Theory-Based  
489 Design and Development of a Socially Connected, Gamified Mobile App for Men About  
490 Breastfeeding (Milk Man). *JMIR mHealth and uHealth*. 2016 Jun 27;4(2):e5652.

- 491 23. Stoyanov SR, Hides L, Kavanagh DJ, Wilson H. Development and Validation of the User  
492 Version of the Mobile Application Rating Scale (uMARS). *JMIR mHealth and uHealth*. 2016  
493 Jun 10;4(2):e5849.
- 494 24. Stoyanov SR, Hides L, Kavanagh DJ, Zelenko O, Tjondronegoro D, Mani M. Mobile App  
495 Rating Scale: A New Tool for Assessing the Quality of Health Mobile Apps. *JMIR mHealth*  
496 and *uHealth*. 2015 Mar 11;3(1):e3422.
- 497 25. Zhang Y, Li X, Luo S, Liu C, Liu F, Zhou Z. Exploration of Users' Perspectives and Needs and  
498 Design of a Type 1 Diabetes Management Mobile App: Mixed-Methods Study. *JMIR mHealth*  
499 and *uHealth*. 2018 Sep 21;6(9):e11400.
- 500 26. Three Approaches to Qualitative Content Analysis - Hsiu-Fang Hsieh, Sarah E. Shannon, 2005  
501 [Internet]. [cited 2024 Mar 1]. Available from:  
502 <https://journals.sagepub.com/doi/abs/10.1177/1049732305276687>
- 503 27. Haichao Z, Gil T, Kang E. A feasibility study of Korean Mobile Application Rating Scale  
504 (MARS) for evaluating the quality of blood pressure management apps. *Korean Journal of*  
505 *Health Education and Promotion*. 2018 Sep 30;35:41–51.
- 506 28. Mazeas A, Duclos M, Pereira B, Chalabaev A. Evaluating the Effectiveness of Gamification on  
507 Physical Activity: Systematic Review and Meta-analysis of Randomized Controlled Trials.  
508 *Journal of Medical Internet Research*. 2022 Jan 4;24(1):e26779.
- 509 29. Yang Y, Hu H, Koenigstorfer J. Effects of Gamified Smartphone Applications on Physical  
510 Activity: A Systematic Review and Meta-Analysis. *American Journal of Preventive Medicine*.  
511 2022 Apr 1;62(4):602–13.
- 512 30. Statista [Internet]. [cited 2024 Mar 25]. Android and iOS market share Australia 2024.  
513 Available from: <https://www.statista.com/statistics/861532/australia-mobile-os-share/>
- 514

Figure 1. Examples of MovSnax app screenshots

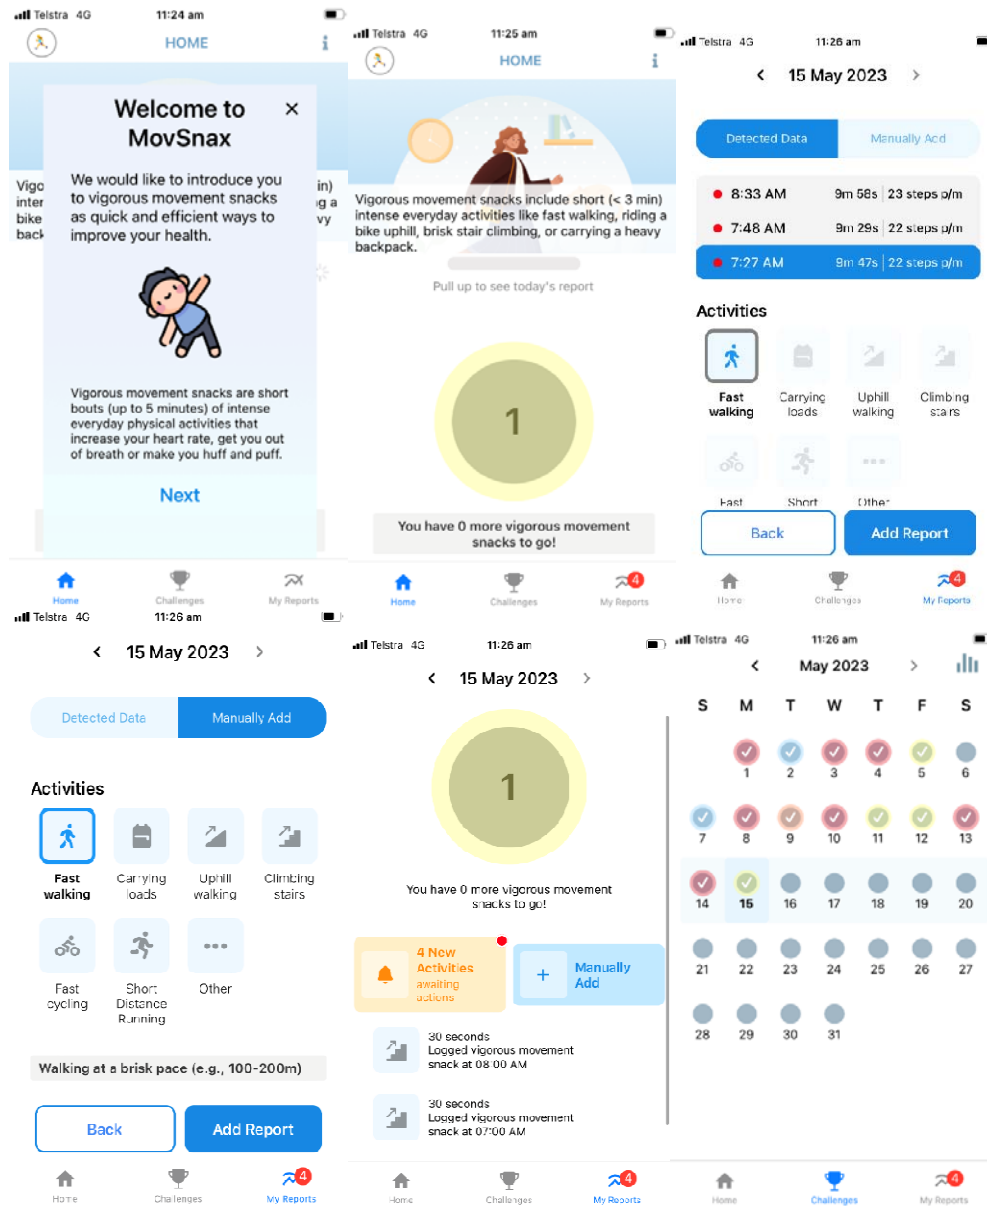



Table 1. Part C app quality rated using the uMARS ( $n=35$ )

| <b>Item</b>                                                              | <b><i>M (SD)</i></b> |
|--------------------------------------------------------------------------|----------------------|
| <b>Objective quality subscale (range: 1-5)</b>                           | 3.32 (.77)           |
| Engagement                                                               | 2.81 (.88)           |
| Functionality                                                            | 3.26 (1.08)          |
| Aesthetics                                                               | 3.47 (.90)           |
| Information                                                              | 3.43 (.85)           |
| <b>Subjective quality total score (range: 1-5)</b>                       | 2.43 (1.23)          |
| What is your overall (star) rating of the app                            | 2.51 (1.27)          |
| Would you recommend this app to people who might benefit from it?        | 2.37 (1.19)          |
| How many times do you think you would use this app in the next 12 month? | 2.91 (1.80)          |
| Would you pay for this app?                                              | 1.91 (1.15)          |
| <b>Perceived impact (range: 1-5)</b>                                     | 2.98 (1.17)          |
| Awareness                                                                | 3.14 (1.22)          |
| Knowledge                                                                | 2.97 (1.25)          |
| Attitudes                                                                | 3.06 (1.33)          |
| Intention to change                                                      | 3.03 (1.34)          |
| Help seeking                                                             | 2.57 (1.17)          |
| Behavior change                                                          | 3.09 (1.25)          |
